# Supplementary material
Source: HighWire-hosted journal article supplement (https://bmjopen.bmj.com/content/10/11/e040541)
Supplement: inline-supplementary-material-1 [file inline-supplementary-material-1.pdf]

**Supplementary Table 1. Example oral care products for acute care settings**

| Category               | Sub-category      | Product                  | Use                                                                                                                                              | Example products <sup>a</sup>                                                                                       |
|------------------------|-------------------|--------------------------|--------------------------------------------------------------------------------------------------------------------------------------------------|---------------------------------------------------------------------------------------------------------------------|
| <b>Pharmaceuticals</b> | Antiseptics       | Chlorhexidine rinse      | <ul style="list-style-type: none"> <li>Control of oral bacteria overgrowth</li> </ul>                                                            | Perox-A-Mint® Solution (Sage Products, active ingredient: hydrogen peroxide)                                        |
|                        |                   | Povidine iodine rinse    |                                                                                                                                                  |                                                                                                                     |
|                        |                   | Triclosan rinse          |                                                                                                                                                  |                                                                                                                     |
|                        |                   | Peroxide rinse           |                                                                                                                                                  |                                                                                                                     |
|                        |                   | Antibiotic gel/pastes    |                                                                                                                                                  |                                                                                                                     |
|                        | Oral rinses       | Non-alcohol based rinse  | <ul style="list-style-type: none"> <li>“Mouth wash”</li> <li>Odor control; symptom relief</li> </ul>                                             | Corinz® Antiseptic Cleansing & Moisturizing Oral Rinse (Sage Products, active ingredient: cetylpyridinium chloride) |
|                        |                   | Alcohol-based rinse      |                                                                                                                                                  |                                                                                                                     |
|                        | Pastes            | Tooth paste              | <ul style="list-style-type: none"> <li>Plaque removal</li> <li>Fluoride delivery</li> <li>Caries prevention</li> </ul>                           | OroClean tooth gel (Intersurgical product)                                                                          |
|                        | Lip Protector     | Balm or ointment         | <ul style="list-style-type: none"> <li>Lip integrity; symptom relief</li> <li>Atmospheric barrier</li> </ul>                                     | No examples identified in sample                                                                                    |
|                        |                   | Petrolatum               |                                                                                                                                                  |                                                                                                                     |
|                        | Oral moisturizers | Gel or cream moisturizer | <ul style="list-style-type: none"> <li>Oral tissue hydration (i.e., mucous membranes, tongue, etc.)</li> <li>Symptom relief (dryness)</li> </ul> | Toothette® Mouth Moisturizer (Sage product)                                                                         |
|                        |                   | Spray moisturizer        |                                                                                                                                                  |                                                                                                                     |
| <b>Devices/tools</b>   | Suction tools     | Hard catheters           | <ul style="list-style-type: none"> <li>“Yankauer”</li> <li>Removal of oral secretions</li> <li>Prevention of aspiration</li> </ul>               | BALLARD® Turbo-Cleaning Closed Suction System (Avanos product)                                                      |
|                        |                   | Flexible catheters       |                                                                                                                                                  |                                                                                                                     |
|                        | Swabs             | Disposable swabs         | <ul style="list-style-type: none"> <li>Oral application of liquids, gels,</li> </ul>                                                             | Toothette® Plus Swabs – Untreated (Sage product)                                                                    |
|                        |                   | Suction swabs            |                                                                                                                                                  |                                                                                                                     |

|  |                   |                      |                                                                                                                                |                                                                                                                                                                          |
|--|-------------------|----------------------|--------------------------------------------------------------------------------------------------------------------------------|--------------------------------------------------------------------------------------------------------------------------------------------------------------------------|
|  |                   |                      | moisturizers and antiseptics <ul style="list-style-type: none"> <li>• Oral-dental cleaning</li> </ul>                          | DenTips® Oral Swabsticks (Medline product)                                                                                                                               |
|  | Tooth brushes     | Manual tooth brush   | <ul style="list-style-type: none"> <li>• Debridement of plaque/biofilm</li> <li>• Tongue cleaning</li> </ul>                   | Orocare™ Aspire suction toothbrush (Intersurgical product)                                                                                                               |
|  |                   | Manual suction brush |                                                                                                                                | Toothette® suction toothbrush                                                                                                                                            |
|  |                   | Power brush          |                                                                                                                                |                                                                                                                                                                          |
|  | Oral hygiene kits | Single use kit       | <ul style="list-style-type: none"> <li>• Composite tool set</li> </ul>                                                         | Assisted Care 24 Hour Oral Care Kits (Avanos product)                                                                                                                    |
|  |                   | Multi-hour kit       |                                                                                                                                | OroCare™ 24-hr day kit – q4 (Intersurgical product)<br><br>Q•Care® Oral Cleaning and Suction System q2 (Sage product)<br><br>24-Hour Oral Care Bag Kit (Medline product) |
|  | Bite block        | Bite block           | <ul style="list-style-type: none"> <li>• Prevention of biting</li> <li>• Mouth opening; prevention of mouth closure</li> </ul> | No examples identified in sample                                                                                                                                         |
|  |                   | Oral prop            |                                                                                                                                |                                                                                                                                                                          |
